# Supplementary material for: Aberrant chimeric RNA GOLM1-MAK10 encoding a secreted fusion protein as a molecular signature for human esophageal squamous cell carcinoma
Source: PubMed Central journal article supplement (PMC3875775; doi:10.18632/oncotarget.1465), 2013-11-01
Supplement: oncotarget-04-2135-s001.pdf [file oncotarget-04-2135-s001.pdf]

## Aberrant chimeric RNA *GOLM1-MAK10* encoding a secreted fusion protein as a molecular signature for human esophageal squamous cell carcinoma - Zhang et al

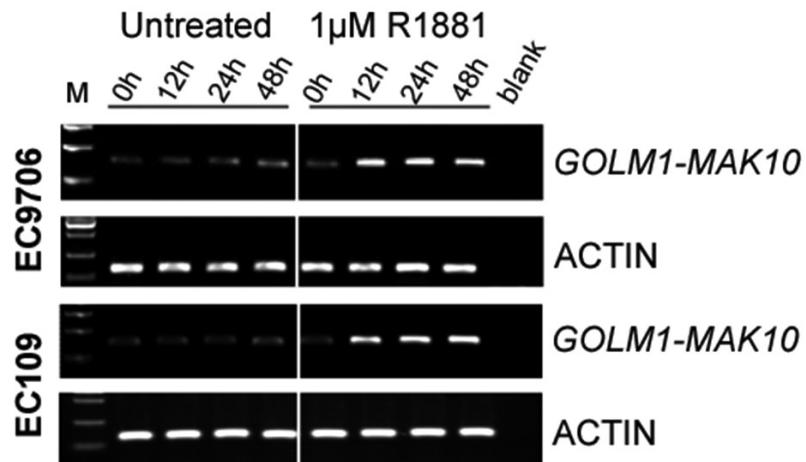

**Supplementary Figure 1: Androgen treatment upregulates the expression of *GOLM1-MAK10* RNA.** Two ESCC cell lines, EC9706 and EC109, were treated with R1881 for various durations followed by RT-PCR assay.  $\beta$ -actin was used as the internal control. Upregulated as early as 12 h following R1881 treatment.
